# Supplementary material for: Carbon flows and biochar stability during co-pyrolysis of human faeces with wood biomass
Source: Royal Society of Chemistry journal article supplement (doi:10.1039/d4ew00513a), 2024-01-01
Supplement: d4ew00513a1.pdf [file d4ew00513a1.pdf]

# Carbon flows and biochar stability during co-pyrolysis of human faeces with wood biomass

M.E. Koulouri\*, M. Qiu, M.R. Templeton, G.D. Fowler

Department of Civil and Environmental Engineering, Imperial College London, UK, SW7 2AZ

Keywords: human excreta, faecal sludge, carbon sequestration, carbon storage, container-based sanitation

\*Corresponding author email: [maria.koulouri17@imperial.ac.uk](mailto:maria.koulouri17@imperial.ac.uk)

## Supplementary Information

### 1. Lab-scale pyrolysis rotary furnace

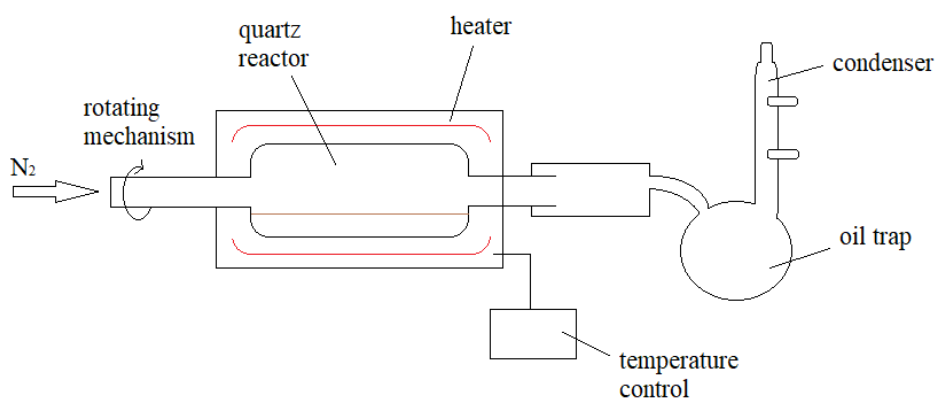

**Figure S1:** Experimental pyrolysis set up (Roger Perry Laboratory, Imperial College London).

### 2. Thermogravimetric analysis of HF, HF50 and WB

The thermal decomposition behaviour of samples HF, HF50 and WB is depicted in the thermogravimetric analysis (TGA) and derivative thermogravimetry (DTG) curves shown in **Figure S2**. For all samples a first weight loss peak is observed at around 80 °C and completed by 150 °C, due to drying and dehydration reactions. The maximum rate of decomposition is noticed at 310 °C, 335 °C and 345 °C for HF, HF50 and WB respectively. The earlier peak weight loss rate for faeces compared to wood can be attributed to the decomposition of protein<sup>1</sup>. Main pyrolysis reactions are complete by 500-550 °C for HF, HF50 and 450-500 °C for WB. A distinct shoulder peak is observed for HF at 400-500 °C which has also been observed for previous studies<sup>2</sup> and is attributed to the decomposition of oil and grease<sup>3</sup>. Notably, this shoulder peak is not observed for WB, which shows a distinct single peak associated with lignin and cellulose/hemicellulose decomposition. Further weight loss is observed after 700 °C due to continued carbonisation, particularly for HF which show a weight loss peak at 850°C.

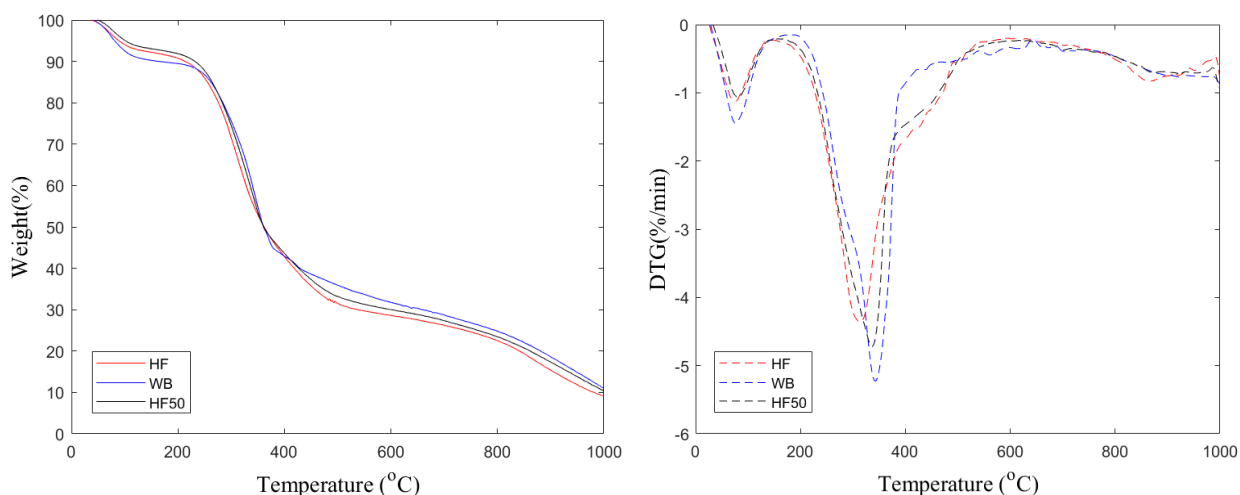

**Figure S2:** TGA and DTG curves for human faeces (HF), wood biomass (WB) and mixed HF:WB 50:50 (HF50).

### 3. FTIR spectra for biochar samples B-HF, B-HF75, B-HF50, B-HF25, B-WB

The Fourier Transform Infrared Spectroscopy (FTIR) spectra for samples B-HF, B-HF75, B-HF50, B-HF25 and B-WB are shown in **Figure S3**. The peaks at  $\sim 1600\text{-}1500\text{ cm}^{-1}$  associated with C=C stretching were stronger for samples containing more WB and are indicative of lignin and aromatic carbon<sup>4</sup>. Peaks in the  $900\text{-}700\text{ cm}^{-1}$  region (C-H bending), associated with mono-, polycyclic and substituted aromatic compounds, were also stronger for the biochars high in WB content, suggesting the enhanced stability of these biochars<sup>5</sup>. On the contrary, strong peaks at  $1040\text{-}1020\text{ cm}^{-1}$  and  $550\text{ cm}^{-1}$  which have been associated with carbohydrates and phosphates, were more intense for the biochars containing more HF and almost eliminated for B-HF25<sup>3,6</sup>. The presence of carbonates was also confirmed by the strong peaks at  $\sim 1030\text{ cm}^{-1}$  as well as peaks at  $870\text{ cm}^{-1}$  and vibrations at  $1500\text{-}1300\text{ cm}^{-1}$ <sup>7</sup>. Bands between wavenumbers  $4000\text{-}2000\text{ cm}^{-1}$  showing C-H and O-H stretching regions are not shown, due to the limited differences observed between samples and the signal noise due to the presence of moisture.

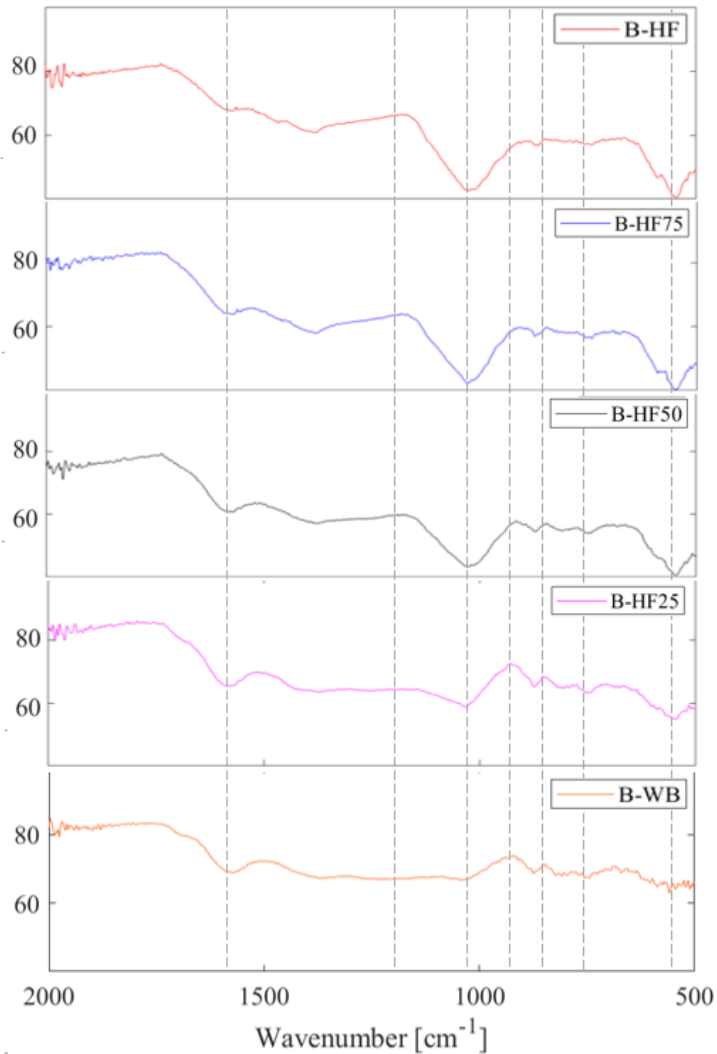

**Figure S3:** Fourier-transform infrared spectroscopy (FTIR) spectra for biochars B-HF, B-HF75, B-HF50, B-HF25 and B-WB produced at 550°C.

#### 4. Biochar yield during pyrolysis

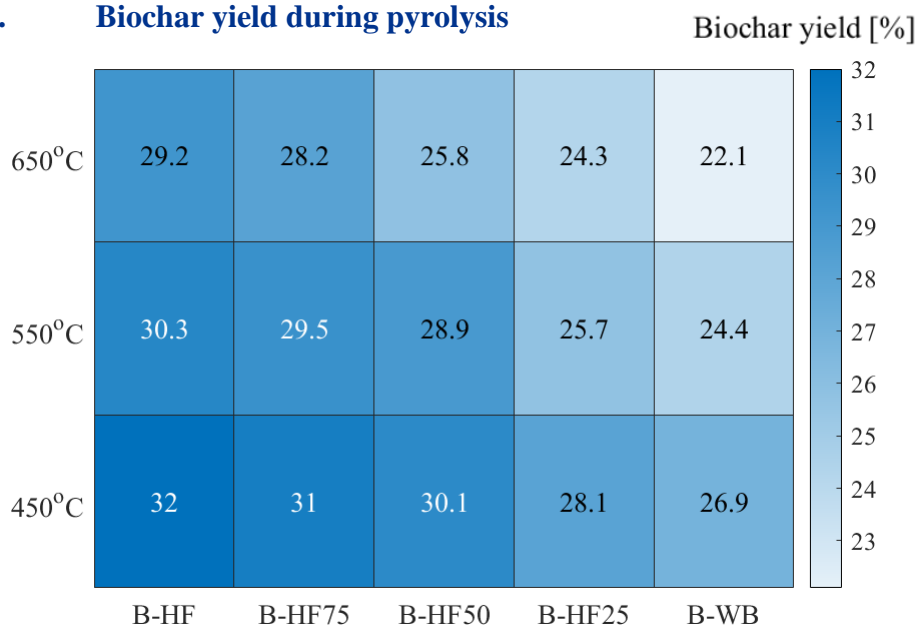

**Figure S4:** Biochar yield for B-HF, B-HF75, B-HF50, B-HF25 and B-WB produced at 450°C, 550°C, 650°C.

## 5. Statistical analysis results

**Table S1:** p-values of one-way ANOVA for differences in feedstock C and proximate analysis results, with changes in HF:WB blending ratio (HF, HF75, HF50, HF25, WB) (**bold** for significant differences  $p < 0.05$ ).

|               | C             | VM            | FC            | Ash           |
|---------------|---------------|---------------|---------------|---------------|
| HF vs. HF75   | 0.1314        | 0.7497        | <0.001        | <0.001        |
| HF vs. HF50   | <b>0.0344</b> | 0.0819        | <0.001        | <0.001        |
| HF vs. HF25   | <b>0.0226</b> | 0.0577        | <0.001        | <0.001        |
| HF vs. WB     | <b>0.0159</b> | <b>0.0397</b> | <0.001        | <0.001        |
| HF75 vs. HF50 | <b>0.008</b>  | <0.001        | <0.001        | <b>0.0014</b> |
| HF75 vs. HF25 | <b>0.0097</b> | <0.001        | <0.001        | <0.001        |
| HF75 vs. WB   | <b>0.0086</b> | <b>0.0025</b> | <0.001        | <0.001        |
| HF50 vs. HF25 | 0.1963        | 0.3731        | <b>0.0098</b> | <b>0.0066</b> |
| HF50 vs. WB   | 0.0739        | 0.1554        | <0.001        | <0.001        |
| HF25 vs. WB   | 0.3608        | 0.2476        | <b>0.0011</b> | <b>0.0011</b> |

**Table S2:** p-values of two-way ANOVA for differences in biochar yield, proximate analysis and dissolved organic carbon (DOC) results, with changes in pyrolysis temperature (450, 550, 650 °C) and HF:WB ratio (B-HF, B-HF75, B-HF50, B-HF25, B-WB) (**bold** for significant differences  $p < 0.05$ ).

| <b>ANOVA table</b>                                      |                 |                |        |        |          |
|---------------------------------------------------------|-----------------|----------------|--------|--------|----------|
|                                                         | Yield           | VM             | FC     | Ash    | DOC      |
| Pyrolysis temperature                                   | <0.001          | <0.001         | <0.001 | <0.001 | <0.001   |
| HF:WB ratio                                             | <0.001          | <0.001         | <0.001 | <0.001 | <0.001   |
| Interaction                                             | <b>0.0278</b>   | <0.001         | <0.001 | <0.001 | <0.001   |
| <b>Multiple comparison test - Pyrolysis temperature</b> |                 |                |        |        |          |
| 450-550                                                 | <0.001          | <0.001         | <0.001 | <0.001 | <0.001   |
| 450-650                                                 | <0.001          | <0.001         | <0.001 | <0.001 | <0.001   |
| 550-650                                                 | <0.001          | <0.001         | <0.001 | <0.001 | 0.055315 |
| <b>Multiple comparison test – HF:WB ratio</b>           |                 |                |        |        |          |
| B-HF vs. B-HF75                                         | <b>0.017679</b> | 0.98839        | <0.001 | <0.001 | <0.001   |
| B-HF vs. B-HF50                                         | <0.001          | <b>0.03623</b> | <0.001 | <0.001 | <0.001   |
| B-HF vs. B-HF25                                         | <0.001          | <b>0.02035</b> | <0.001 | <0.001 | <0.001   |
| B-HF vs. B-WB                                           | <0.001          | <b>0.00100</b> | <0.001 | <0.001 | <0.001   |
| B-HF75 vs. B-HF50                                       | <0.001          | 0.05158        | <0.001 | <0.001 | <0.001   |
| B-HF75 vs. B-HF25                                       | <0.001          | <b>0.00992</b> | <0.001 | <0.001 | <0.001   |
| B-HF75 vs. B-WB                                         | <0.001          | <0.001         | <0.001 | <0.001 | <0.001   |
| B-HF50 vs. B-HF25                                       | <0.001          | 0.95807        | <0.001 | <0.001 | 0.2541   |
| B-HF50 vs. B-WB                                         | <0.001          | 0.37036        | <0.001 | <0.001 | 0.0954   |
| B-HF25 vs. B-WB                                         | <0.001          | 0.77632        | <0.001 | <0.001 | 0.9846   |

**Table S3:** p-values of one-way ANOVA for differences in biochar stability (H<sub>2</sub>O<sub>2</sub> oxidation, R<sub>50</sub> recalcitrance index) and carbon retention, with changes in HF:WB blending ratio (B-HF, B-HF75, B-HF50, B-HF25, B-WB) (**bold** for significant differences p<0.05).

| Compared HF:WB ratios | H <sub>2</sub> O <sub>2</sub> oxidation | R <sub>50</sub> index | Carbon retention |
|-----------------------|-----------------------------------------|-----------------------|------------------|
| B-HF vs. B-HF75       | < <b>0.001</b>                          | 0.90544               | <b>0.00139</b>   |
| B-HF vs. B-HF50       | < <b>0.001</b>                          | <b>0.02448</b>        | < <b>0.001</b>   |
| B-HF vs. B-HF25       | < <b>0.001</b>                          | < <b>0.001</b>        | < <b>0.001</b>   |
| B-HF vs. B-WB         | < <b>0.001</b>                          | <b>0.00316</b>        | < <b>0.001</b>   |
| B-HF75 vs. B-HF50     | < <b>0.001</b>                          | 0.13885               | < <b>0.001</b>   |
| B-HF75 vs. B-HF25     | < <b>0.001</b>                          | < <b>0.001</b>        | < <b>0.001</b>   |
| B-HF75 vs. B-WB       | < <b>0.001</b>                          | <b>0.02169</b>        | < <b>0.001</b>   |
| B-HF50 vs. B-HF25     | 0.09070                                 | 0.18429               | 0.62127          |
| B-HF50 vs. B-WB       | < <b>0.001</b>                          | 0.8844                | 0.73968          |
| B-HF25 vs. B-WB       | < <b>0.001</b>                          | 0.64576               | 0.09980          |

**Table S4:** Two-way ANOVA results for differences in carbon flows to the biochar fraction, with changes in wood addition (HF, HF50, WB) and retention time (0.5, 2 h).

| <b>ANOVA table for biochar carbon flows (N<sub>2</sub> flow constant)</b> |              |                 |              |        |                |
|---------------------------------------------------------------------------|--------------|-----------------|--------------|--------|----------------|
| <b>Effect of wood addition &amp; retention time</b>                       |              |                 |              |        |                |
|                                                                           | SS           | df              | MS           | F      | p-Value        |
| Retention time                                                            | 5.445        | 1               | 5.445        | 4.4    | 0.0577         |
| Feedstock type                                                            | 318.69       | 2               | 159.345      | 128.85 | < <b>0.001</b> |
| Interaction(time:type)                                                    | 0.09         | 2               | 0.045        | 0.04   | 0.9644         |
| Error                                                                     | 14.84        | 12              | 1.237        |        |                |
| Total                                                                     | 339.065      | 17              |              |        |                |
| <b>Multiple comparison test: Feedstock type (HF, HF50, WB)</b>            |              |                 |              |        |                |
|                                                                           | Lower 95% CI | Mean difference | Upper 95% CI |        | p-Value        |
| HF vs. HF50                                                               | -10.7129     | -9              | -7.2871      |        | < <b>0.001</b> |
| HF vs. WB                                                                 | -10.5629     | -8.85           | -7.1371      |        | < <b>0.001</b> |
| HF50 vs. WB                                                               | -1.5629      | 0.15            | 1.8629       |        | 0.9704         |

**Table S5:** Two-way ANOVA results for differences in carbon flows to the biochar fraction, with changes in wood addition (HF, HF50, WB) and N<sub>2</sub> gas flow rate (0.5, 1.5 L/min).

| <b>ANOVA table for biochar carbon flows (retention time constant)</b> |              |                 |              |       |                |
|-----------------------------------------------------------------------|--------------|-----------------|--------------|-------|----------------|
| <b>Effect of wood addition &amp; N<sub>2</sub> gas flow rate</b>      |              |                 |              |       |                |
|                                                                       | SS           | df              | MS           | F     | p-Value        |
| N <sub>2</sub> gas flow                                               | 37.845       | 1               | 37.845       | 28.03 | < <b>0.001</b> |
| Feedstock type                                                        | 144.39       | 2               | 72.195       | 53.48 | < <b>0.001</b> |
| Interaction(gas:type)                                                 | 36.39        | 2               | 18.195       | 13.48 | < <b>0.001</b> |
| Error                                                                 | 16.2         | 12              | 1.35         |       |                |
| Total                                                                 | 234.825      | 17              |              |       |                |
| <b>Multiple comparison test: Feedstock type (HF, HF50, WB)</b>        |              |                 |              |       |                |
|                                                                       | Lower 95% CI | Mean difference | Upper 95% CI |       | p-Value        |
| HF vs. HF50                                                           | -8.2897      | -6.5            | -4.7103      |       | < <b>0.001</b> |
| HF vs. WB                                                             | -7.1397      | -5.35           | -3.5603      |       | < <b>0.001</b> |
| HF50 vs. WB                                                           | -0.6397      | 1.15            | 2.9397       |       | 0.24           |

**Table S6:** Two-way ANOVA results for differences in carbon flows to the bio-oil fraction, with changes in wood addition (HF, HF50, WB) and retention time (0.5, 2 h).

| <b>ANOVA table for bio-oil carbon flows (N<sub>2</sub> flow constant)</b> |              |                 |              |       |                |
|---------------------------------------------------------------------------|--------------|-----------------|--------------|-------|----------------|
| <b>Effect of wood addition &amp; retention time</b>                       |              |                 |              |       |                |
|                                                                           | SS           | df              | MS           | F     | p-Value        |
| Retention time                                                            | 450          | 1               | 450          | 346.6 | < <b>0.001</b> |
| Feedstock type                                                            | 196          | 2               | 98           | 75.48 | < <b>0.001</b> |
| Interaction(time:type)                                                    | 84           | 2               | 42           | 32.35 | < <b>0.001</b> |
| Error                                                                     | 15.58        | 12              | 1.2983       |       |                |
| Total                                                                     | 745.58       | 17              |              |       |                |
| <b>Multiple comparison test: Feedstock type (HF, HF50, WB)</b>            |              |                 |              |       |                |
|                                                                           | Lower 95% CI | Mean difference | Upper 95% CI |       | p-Value        |
| HF vs. HF50                                                               | 1.2449       | 3               | 4.7551       |       | <b>0.017</b>   |
| HF vs. WB                                                                 | 6.2449       | 8               | 9.7551       |       | < <b>0.001</b> |
| HF50 vs. WB                                                               | 3.2449       | 5               | 6.7551       |       | < <b>0.001</b> |

**Table S7:** Two-way ANOVA results for differences in carbon flows to the bio-oil fraction, with changes in wood addition (HF, HF50, WB) and N<sub>2</sub> gas flow rate (0.5, 1.5 L/min).

| <b>ANOVA table for bio-oil carbon flows (retention time constant)</b> |              |                 |              |       |                |
|-----------------------------------------------------------------------|--------------|-----------------|--------------|-------|----------------|
| <b>Effect of wood addition &amp; N<sub>2</sub> gas flow rate</b>      |              |                 |              |       |                |
|                                                                       | SS           | df              | MS           | F     | p-Value        |
| N <sub>2</sub> gas flow                                               | 722          | 1               | 722          | 613.6 | < <b>0.001</b> |
| Feedstock type                                                        | 57           | 2               | 28.5         | 24.22 | < <b>0.001</b> |
| Interaction(gas:type)                                                 | 13           | 2               | 6.5          | 5.52  | <b>0.0199</b>  |
| Error                                                                 | 14.12        | 12              | 5.52         |       |                |
| Total                                                                 | 806.12       | 17              |              |       |                |
| <b>Multiple comparison test: Feedstock type (HF, HF50, WB)</b>        |              |                 |              |       |                |
|                                                                       | Lower 95% CI | Mean difference | Upper 95% CI |       | p-Value        |
| HF vs. HF50                                                           | -2.1708      | -0.5            | 1.1708       |       | 0.7110         |
| HF vs. WB                                                             | 1.8292       | 3.5             | 5.1708       |       | < <b>0.001</b> |
| HF50 vs. WB                                                           | 2.3292       | 4               | 5.6708       |       | < <b>0.001</b> |

**Table S8:** Two-way ANOVA results for differences in carbon flows to the non-condensable gases (NCG) fraction, with changes in wood addition (HF, HF50, WB) and retention time (0.5, 2 h).

| <b>ANOVA table for NCG carbon flows (N<sub>2</sub> flow constant)</b> |              |                 |              |        |                |
|-----------------------------------------------------------------------|--------------|-----------------|--------------|--------|----------------|
| <b>Effect of wood addition &amp; retention time</b>                   |              |                 |              |        |                |
|                                                                       | SS           | df              | MS           | F      | p-Value        |
| Retention time                                                        | 612.5        | 1               | 612.5        | 136.67 | < <b>0.001</b> |
| Feedstock type                                                        | 124          | 2               | 62           | 13.83  | < <b>0.001</b> |
| Interaction(time:type)                                                | 76           | 2               | 38           | 8.48   | <b>0.0051</b>  |
| Error                                                                 | 53.78        | 12              | 4.482        |        |                |
| Total                                                                 | 866.28       | 17              |              |        |                |
| <b>Multiple comparison test: Feedstock type (HF, HF50, WB)</b>        |              |                 |              |        |                |
|                                                                       | Lower 95% CI | Mean difference | Upper 95% CI |        | p-Value        |
| HF vs. HF50                                                           | 2.7392       | 6               | 9.2608       |        | <b>0.001</b>   |
| HF vs. WB                                                             | -2.2608      | 1               | 4.2608       |        | 0.6993         |
| HF50 vs. WB                                                           | -8.2608      | -5              | -1.7392      |        | <b>0.0039</b>  |

**Table S9:** Two-way ANOVA results for differences in carbon flows to the non-condensable gases (NCG) fraction, with changes in wood addition (HF, HF50, WB) and N<sub>2</sub> gas flow rate (0.5, 1.5 L/min).

| <b>ANOVA table for NCG carbon flows (retention time constant)</b> |              |                 |              |        |                |
|-------------------------------------------------------------------|--------------|-----------------|--------------|--------|----------------|
| <b>Effect of wood addition &amp; N<sub>2</sub> gas flow rate</b>  |              |                 |              |        |                |
| N <sub>2</sub> gas flow                                           | 1058         | 1               | 1058         | 233.47 | < <b>0.001</b> |
| Feedstock type                                                    | 163          | 2               | 81.5         | 17.98  | < <b>0.001</b> |
| Interaction(gas:type)                                             | 49           | 2               | 24.5         | 5.41   | <b>0.0212</b>  |
| Error                                                             | 54.38        | 12              |              |        |                |
| Total                                                             | 1324.38      | 17              |              |        |                |
| <b>Multiple comparison test: Feedstock type (HF, HF50, WB)</b>    |              |                 |              |        |                |
|                                                                   | Lower 95% CI | Mean difference | Upper 95% CI |        | p-Value        |
| HF vs. HF50                                                       | 3.7211       | 7               | 10.2789      |        | < <b>0.001</b> |
| HF vs. WB                                                         | -1.7789      | 1.5             | 4.7789       |        | 0.4642         |
| HF50 vs. WB                                                       | -8.7789      | -5.5            | -2.2211      |        | <b>0.002</b>   |

## References

- 1 M. E. Koulouri, M. R. Templeton and G. D. Fowler, Source separation of human excreta: Effect on resource recovery via pyrolysis, *J. Environ. Manage.*, 2023, **338**, 117782.
- 2 T. Somorin, A. Parker, E. McAdam, L. Williams, S. Tyrrel, A. Kolios and Y. Jiang, Pyrolysis characteristics and kinetics of human faeces, simulant faeces and wood biomass by thermogravimetry–gas chromatography–mass spectrometry methods, *Energy Reports*, 2020, **6**, 3230–3239.
- 3 B. C. Krueger, G. D. Fowler, M. R. Templeton and S. Septien, Faecal sludge pyrolysis: Understanding the relationships between organic composition and thermal decomposition, *J. Environ. Manage.*, 2021, **298**, 113456.
- 4 R. Janu, V. Mrlik, D. Ribitsch, J. Hofman, P. Sedláček, L. Bielská and G. Soja, Biochar surface functional groups as affected by biomass feedstock, biochar composition and pyrolysis temperature, *Carbon Resour. Convers.*, 2021, **4**, 36–46.
- 5 K. Sahoo, A. Kumar and J. Chakraborty, A comparative study on valuable products: bio-oil, biochar, non-condensable gases from pyrolysis of agricultural residues, *Journal of Material Cycles and Waste Management*, 2021, **23**, 186–204.
- 6 W. Jastrzębski, M. Sitarz, M. Rokita and K. Bułat, Infrared spectroscopy of different phosphates structures, *Spectrochim. Acta. A. Mol. Biomol. Spectrosc.*, 2011, **79**, 722–727.
- 7 F. B. Reig, J. V. G. Adelantado and M. C. M. Moya Moreno, FTIR quantitative analysis of calcium carbonate (calcite) and silica (quartz) mixtures using the constant ratio method. Application to geological samples, *Talanta*, 2002, **58**, 811–821.
